# Supplementary material for: Key traveller groups of relevance to spatial malaria transmission: a survey of movement patterns in four sub-Saharan African countries
Source: Springer Nature journal article supplement (doi:10.1186/s12936-016-1252-3), 2016-04-12
Supplement: MOESM3 [file 10027274]

**Table S1 – Descriptive statistics and trip clusters for the two Mali surveys**

| <b><u>Interviewees:</u></b>                | <b><u>September 2010:</u></b> |             | <b><u>March 2011:</u></b> |             |
|--------------------------------------------|-------------------------------|-------------|---------------------------|-------------|
|                                            | <i>N</i>                      | % (CI)      | <i>N</i>                  | % (CI)      |
| <b>Total interviewees</b>                  | 651                           |             | 937                       |             |
| <b>Gender</b>                              |                               |             |                           |             |
| Female                                     | 289                           | 44 (41-48)  | 441                       | 47 (44-50)  |
| Male                                       | 359                           | 55 (51-59)  | 495                       | 53 (50-56)  |
| <b>Age</b>                                 |                               |             |                           |             |
| 16-29                                      | 335                           | 51 (48-55)  | 425                       | 45 (42-49)  |
| 30-45                                      | 204                           | 31 (28-35)  | 307                       | 33 (30-36)  |
| >45                                        | 112                           | 17 (14-20)  | 205                       | 22 (19-25)  |
| <b>Mean # children &lt;5 years (range)</b> |                               | 0.76 (0-6)  |                           | 0.84 (0-9)  |
| <b>Mean # trips (range)</b>                |                               | 1.94 (1-51) |                           | 1.30 (1-51) |
| <b>Own phone</b>                           |                               |             |                           |             |
| Yes                                        | 350                           | 54 (49-58)  | 509                       | 54 (51-58)  |
| No                                         | 301                           | 46 (42-50)  | 426                       | 45 (42-49)  |
| <b><u>Trips:</u></b>                       |                               |             |                           |             |
|                                            | <i>N</i>                      | % (CI)      | <i>N</i>                  | % (CI)      |
| <b>Total num. of trips</b>                 | 651                           |             | 937                       |             |
| <b>Cluster (all Mali survey locations)</b> |                               |             |                           |             |
| Women with children                        | 148                           | 22 (19-25)  | 250                       | 23 (20-25)  |
| Youth workers                              | 276                           | 41 (37-45)  | 311                       | 28 (26-31)  |
| General                                    | 247                           | 37 (33-41)  | 537                       | 49 (46-52)  |
| <b>Cluster (Bamako and Kalabancoro)</b>    |                               |             |                           |             |
| Women with children                        | 47                            | 25 (19-32)  | 43                        | 17 (12-22)  |
| Youth workers                              | 84                            | 45 (38-52)  | 133                       | 51 (45-57)  |
| General                                    | 56                            | 30 (23-37)  | 84                        | 32 (27-38)  |
| <b>Cluster (Baraoueli and Boidie)</b>      |                               |             |                           |             |
| Women with children                        | 50                            | 22 (17-28)  | 75                        | 28 (23-34)  |
| Youth workers                              | 76                            | 33 (27-40)  | 37                        | 14 (10-18)  |
| General                                    | 101                           | 44 (38-51)  | 158                       | 59 (52-64)  |
| <b>Cluster (Baya)</b>                      |                               |             |                           |             |
| Women with children                        | 51                            | 20 (15-25)  | 79                        | 27 (22-32)  |
| Youth workers                              | 116                           | 45 (39-51)  | 35                        | 12 (8-16)   |
| General                                    | 90                            | 35 (29-41)  | 183                       | 62 (56-67)  |
| <b>Cluster (Mopti and Fatoma)</b>          |                               |             |                           |             |
| Women with children                        | N/A                           | N/A         | 53                        | 20 (15-25)  |
| Youth workers                              | N/A                           | N/A         | 106                       | 39 (33-45)  |
| General                                    | N/A                           | N/A         | 112                       | 41 (35-47)  |
